# Supplementary material
Source: PubMed Central journal article supplement (PMC7393584)
Supplement: jamaoncol-e202922-s002.pdf [file jamaoncol-e202922-s002.pdf]

## Supplementary Online Content

Geuzinge HA, Obdeijn I-M, Rutgers EJT, et al; for the Familial MRI Screening (FaMRisc) Study group. Cost-effectiveness of breast cancer screening with magnetic resonance imaging for women at familial risk. *JAMA Oncol*. Published online July 30, 2020. doi:10.1001/jamaoncol.2020.2922

**eFigure 1.** Model Structure

**eFigure 2.** Observed and Predicted Screen-Detected Cancers According to T-Stage

**eTable 1.** Unit Prices per Procedure Associated With Breast Cancer Screening, Diagnosis and Treatment

**eTable 2.** Utility Values and Durations

**eTable 3.** Alternative Utility Values and Durations Used in a Scenario Analysis

**eTable 4.** Mean Costs per Tumor Stage

**eTable 5.** Modelled Effects and Costs per 1000 Women of Dominated Screening Protocols and of Protocols With an ICER >100,000 Euro per QALY Gained

**eReferences**

This supplementary material has been provided by the authors to give readers additional information about their work.

**eFigure 1. Model Structure**

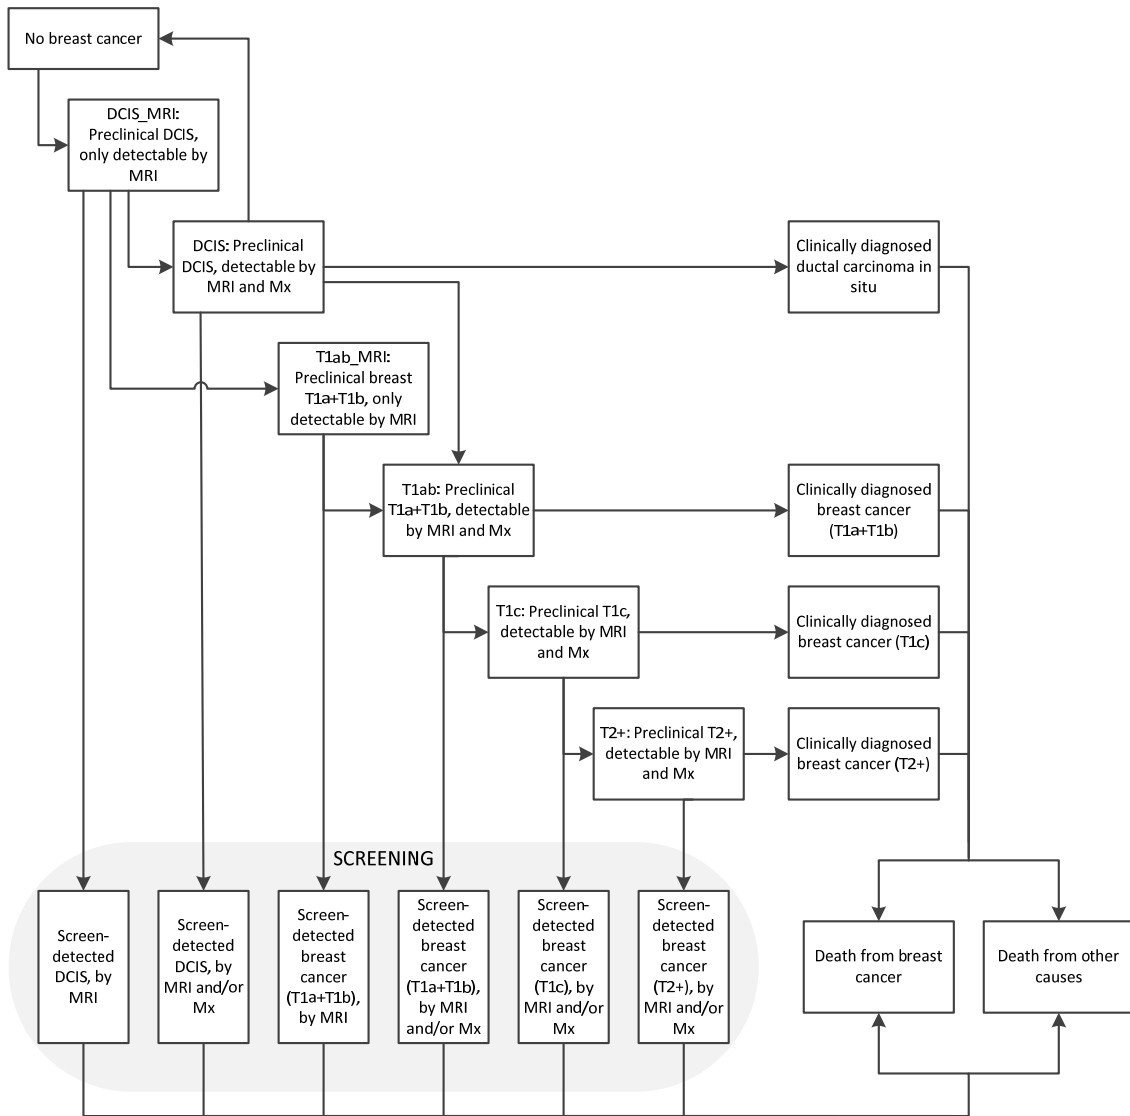

**eTable 1.** Unit Prices per Procedure Associated With Breast Cancer Screening, Diagnosis and Treatment

| <b>Procedure</b>                                     | <b>Unit price (€)</b>                  |
|------------------------------------------------------|----------------------------------------|
| Screening and diagnosis                              |                                        |
| Mammography                                          | 91.97 <sup>a</sup> /69.10 <sup>b</sup> |
| MRI                                                  | 272.00                                 |
| Consultation (with CBE)                              | 72.57                                  |
| Ultrasound                                           | 115.23                                 |
| Fine needle aspiration                               | 288.62                                 |
| Biopsy                                               | 288.62                                 |
| Surgery                                              |                                        |
| Breast conserving surgery                            | 1452.49                                |
| Breast conserving surgery incl. sentinel node biopsy | 1512.14                                |
| Mastectomy                                           | 1623.35                                |
| Mastectomy incl. sentinel node biopsy                | 1682.99                                |
| Lymph node dissection                                | 884.98                                 |
| Adjuvant therapy                                     |                                        |
| Radiotherapy                                         | 6885.05                                |
| Chemotherapy                                         | 3573.21                                |
| Chemotherapy followed by one year of Trastuzumab     | 25832.18                               |
| Hormonal therapy                                     | 2574.81                                |

Prices derived from the study by Saadatmand et al (1) and the costing manual (2) were converted to Euro 2018 prices using consumer price indices (3).

a Mammography at a hospital (screening and diagnostic)

b Mammography within the national breast cancer screening programme

**eTable 2.** Utility Values and Durations

| <b>Health state</b>                       | <b>Utility value</b> | <b>Duration</b> |
|-------------------------------------------|----------------------|-----------------|
| No breast cancer                          | 0.858                | n.a.            |
| After a (false) positive screening result | 0.105 (disutility)   | 5 weeks         |
| DCIS/localized breast cancer              | 0.772                | 5 years         |
| Regional breast cancer                    | 0.644                | 5 years         |
| Metastasis                                | 0.515                | Until death     |
| Death                                     | 0                    |                 |

**eTable 3.** Alternative Utility Values and Durations Used in a Scenario Analysis

| <b>Health state</b>                                | <b>Utility value</b>  | <b>Duration</b> |
|----------------------------------------------------|-----------------------|-----------------|
| No breast cancer                                   | 0.858                 | n.a.            |
| After a (false) positive screening result          | 0.105<br>(disutility) | 5 weeks         |
|                                                    |                       |                 |
| DCIS/localized breast cancer, first year           | 0.696                 | 1 year          |
| DCIS/localized breast cancer, after the first year | 0.779                 | 10 years        |
| Regional breast cancer                             | 0.685                 | 11 years        |
| Metastasis                                         | 0.515                 | Until death     |
| Death                                              | 0                     |                 |

**eTable 4.** Mean Costs per Tumor Stage

|                | No. of tumors | Mean additional investigation costs, € | Mean surgery costs, € | Mean radiotherapy costs, € | Mean systemic therapy costs, € | Mean total costs, € |
|----------------|---------------|----------------------------------------|-----------------------|----------------------------|--------------------------------|---------------------|
| <b>DCIS</b>    | 25            | 433                                    | 1,554                 | 3,305                      | 0                              | 5,292               |
| <b>T1a, N-</b> | 7             | 624                                    | 1,601                 | 984                        | 0                              | 3,209               |
| <b>T1b, N-</b> | 8             | 627                                    | 1,604                 | 2,582                      | 0                              | 4,813               |
| <b>T1c, N-</b> | 12            | 560                                    | 1,540                 | 4,590                      | 7,511                          | 14,200              |
| <b>T2+, N-</b> | 1             | 669                                    | 1,512                 | 6,885                      | 6,148                          | 15,214              |
| <b>T1a, N+</b> | 0             | n.a.                                   | n.a.                  | n.a.                       | n.a.                           | n.a.                |
| <b>T1b, N+</b> | 2             | 433                                    | 1,512                 | 6,885                      | 3,074                          | 11,904              |
| <b>T1c, N+</b> | 5             | 571                                    | 1,854                 | 5,508                      | 4,403                          | 12,336              |
| <b>T2+, N+</b> | 6             | 890                                    | 2,372                 | 6,885                      | 6,148                          | 16,296              |

In this paper, one additional cancer was added, which was excluded in the previous paper (4). This was an interval cancer between a mammogram and MRI in the first screening round in the MRI-arm. €1 = \$1.13 on July 1, 2020.

**eFigure 2.** Observed and Predicted Screen-Detected Cancers According to T-Stage

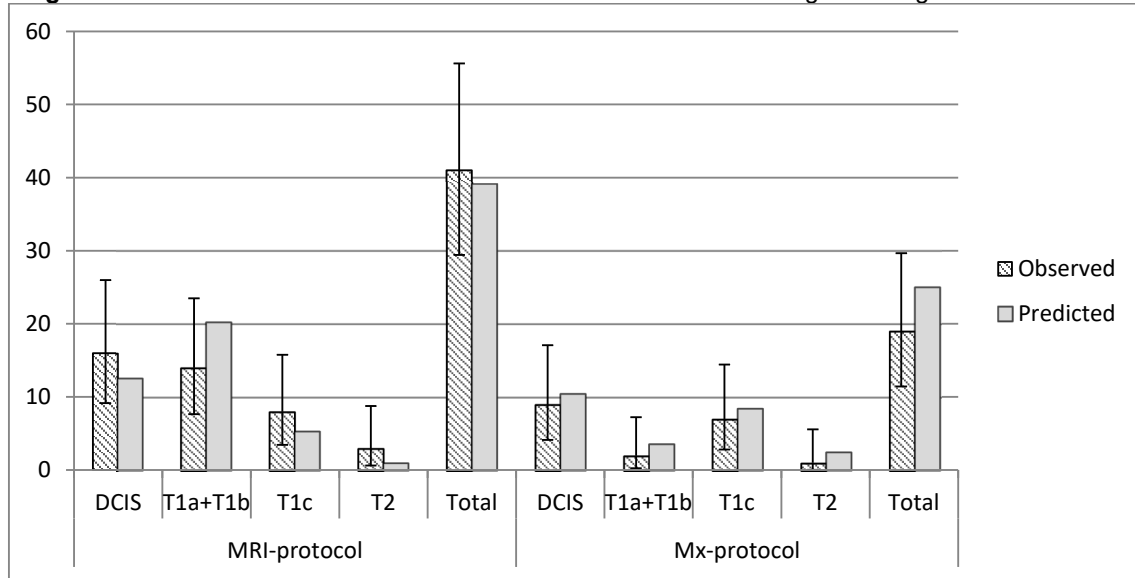

**Table 5.** Modelled Effects and Costs per 1000 Women of Dominated Screening Protocols and of Protocols With an ICER >100,000 Euro per QALY Gained

|                                                          | I          | J          | K          | L          | N          | O          | P          | Q          | R          |
|----------------------------------------------------------|------------|------------|------------|------------|------------|------------|------------|------------|------------|
| Screening rounds                                         | 16,256     | 17,595     | 17,520     | 21,152     | 18,706     | 20,011     | 19,901     | 22,784     | 21,137     |
| Breast cancers                                           | 372        | 371        | 380        | 376        | 370        | 368        | 381        | 349        | 377        |
| Screen detected                                          | 325        | 323        | 334        | 337        | 332        | 327        | 343        | 301        | 338        |
| Clinically diagnosed                                     | 47         | 48         | 46         | 40         | 38         | 41         | 38         | 48         | 38         |
| Breast cancer deaths                                     | 42         | 43         | 42         | 37         | 38         | 40         | 38         | 46         | 36         |
| Reduction breast cancer deaths, compared to no screening | -69%       | -68%       | -69%       | -73%       | -72%       | -71%       | -72%       | -66%       | -74%       |
| False-positives                                          | 1623       | 1,762      | 1,781      | 2,131      | 1759       | 2,020      | 2,010      | 2,240      | 2,715      |
| Overdiagnosis (% of screen-detected cancers)             | 66 (20%)   | 65 (20%)   | 74 (22%)   | 70 (21%)   | 64 (19%)   | 62 (19%)   | 75 (22%)   | 43 (14%)   | 71 (21%)   |
| LYs                                                      | 57,492     | 57,490     | 57,500     | 57,594     | 57,635     | 57,609     | 57,627     | 57,527     | 57,607     |
| QALYs                                                    | 48,977     | 48,972     | 48,979     | 49,079     | 49,117     | 49,086     | 49,099     | 49,002     | 49,088     |
| Costs (€)                                                |            |            |            |            |            |            |            |            |            |
| Screening tests                                          | 3,498,785  | 3,855,876  | 4,225,106  | 4,839,223  | 4,725,348  | 4,625,117  | 4,866,252  | 4,388,062  | 5,600,707  |
| Diagnosis                                                | 866,028    | 966,838    | 979,856    | 1,148,518  | 1,111,498  | 1,132,147  | 1,138,247  | 1,251,846  | 1,472,032  |
| Treatment                                                | 2,604,847  | 2,639,056  | 2,574,523  | 2,408,956  | 2,509,938  | 2,589,918  | 2,489,337  | 2,980,128  | 2,381,939  |
| Breast cancer death                                      | 826,524    | 843,959    | 823,942    | 719,972    | 742,591    | 785,312    | 752,129    | 904,354    | 705,282    |
| Death other causes                                       | 14,205,372 | 14,192,464 | 14,207,268 | 14,285,271 | 14,268,542 | 14,236,904 | 14,261,547 | 14,147,949 | 14,296,118 |
| Total                                                    | 22,001,557 | 22,498,193 | 22,810,695 | 23,401,940 | 23,357,918 | 23,369,399 | 23,507,512 | 23,672,340 | 24,456,077 |
| QALYs gained**                                           | 325        | 325        | 326        | 347        | 367        | 361        | 363        | 347        | 348        |
| Total costs (€)*                                         | 6,271,826  | 6,610,610  | 6,722,959  | 6,998,746  | 7,241,465  | 7,316,046  | 7,375,201  | 7,438,477  | 7,526,288  |
| ACER (€/QALY)*                                           | 3,853      | 4,894      | 5,228      | 5,701      | 6,057      | 6,359      | 6,496      | 6,969      | 7,209      |
| ICER (€/QALY)*                                           | Dominated  |



|                                                          | <b>S</b>   | <b>T</b>   | <b>G</b>   | <b>H</b>   | <b>U</b>   |
|----------------------------------------------------------|------------|------------|------------|------------|------------|
| Screening rounds                                         | 22,690     | 26,202     | 27,061     | 25,928     | 25,924     |
| Breast cancers                                           | 358        | 370        | 385        | 377        | 377        |
| Screen detected                                          | 315        | 335        | 360        | 349        | 349        |
| Clinically diagnosed                                     | 42         | 34         | 25         | 28         | 28         |
| Breast cancer deaths                                     | 40         | 36         | 29         | 31         | 30         |
| Reduction breast cancer deaths, compared to no screening | -71%       | -74%       | -79%       | -77%       | -78%       |
| False-positives                                          | 2,266      | 2,466      | 2,771      | 2,444      | 3,380      |
| Overdiagnosis (% of screen-detected cancers)             | 52 (17%)   | 64 (19%)   | 79 (22%)   | 71 (20%)   | 71 (20%)   |
| LYs                                                      | 57,622     | 57,668     | 57,777     | 57,769     | 57,774     |
| QALYs                                                    | 49,100     | 49,145     | 49,252     | 49,250     | 49,246     |
| Total costs                                              |            |            |            |            |            |
| Screening tests                                          | 4,884,424  | 5,243,477  | 6,819,899  | 6,796,109  | 7,123,245  |
| Diagnosis                                                | 1,269,612  | 1,574,109  | 1,524,262  | 1,593,060  | 1,876,975  |
| Treatment                                                | 2,678,728  | 2,493,810  | 2,176,410  | 2,249,955  | 2,242,559  |
| Breast cancer death                                      | 792,564    | 707,330    | 580,499    | 604,132    | 598,822    |
| Death other causes                                       | 14,231,504 | 14,294,899 | 14,389,857 | 14,372,210 | 14,376,257 |
| Total                                                    | 23,856,832 | 24,313,625 | 25,490,928 | 25,615,466 | 26,217,858 |
| QALYs gained <sup>#</sup> *                              | 367        | 372        | 395        | 397        | 393        |
| Total costs (€)*                                         | 7,567,680  | 7,762,521  | 8,237,080  | 8,514,625  | 8,761,895  |
| ACER (€/QALY)*                                           | 6,945      | 7,372      | 8,149      | 8,813      | 9,525      |
| <b>ICER (€/QALY)*</b>                                    | Dominated  | Dominated  | 101,489    | 161,008    | Dominated  |

Breast cancers include invasive breast cancers and DCIS

Outcomes contain the effects of both the described strategy and the subsequent National breast cancer screening programme

LYs: life-years; QALYs: quality-adjusted life-years; ACER: average cost-effectiveness ratio (comparison of a strategy to a situation without screening); ICER: incremental cost-effectiveness ratio (comparison of a strategy to the previous non-dominated strategy in the ranking)

<sup>#</sup> Relative to a situation without screening

\*Discounted by 3.0%

G. annual (MRI 35-65)

H. annual (MRI and triennial Mx 35-60)

I. MRI every 18 months between age 40 and 60

J. annual MRI between age 40 and 50, biennial MRI between age 50 and 60

K. annual MRI between age 40 and 50, biennial MRI between age 50 and 65

L. annual MRI between age 40 and 60

N. MRI every 18 months and triennial mammography between age 35 and 60

O. annual MRI between age 35 and 45, biennial MRI between age 45-60

P. annual MRI between age 35 and 45, biennial MRI between age 45-65

Q. annual MRI between age 35 and 50

R. annual MRI and triennial mammography between age 40 and 60

S. annual MRI between age 35 and 55

T. annual mammography and biennial MRI between age 35 and 60

G. annual MRI between age 35 and 60

H. annual MRI, and triennial mammography between age 35 and 60

U. annual MRI and biennial mammography between age

## eReferences

1. Saadatmand S, Tilanus-Linthorst MMA, Rutgers EJT, Hoogerbrugge N, Oosterwijk JC, Tollenaar REAM, et al. Cost-Effectiveness of Screening Women With Familial Risk for Breast Cancer With Magnetic Resonance Imaging. *J Natl Cancer Inst.* 2013;105(17):1314-21.
2. Hakkaart-van Roijen L, van der Linden N, Bouwmans C, Kanters T, Tan S. *Kostenhandleiding: Methodologie van Kostenonderzoek En Referentieprijzen Voor Economische Evaluaties in de Gezondheidszorg.* Diemen; 2015.
3. Statistics Netherlands. Annual rate of change CPI, since 1963. 2018. Accessed at <http://statline.cbs.nl/Statweb/publication/?DM=SLLEN&PA=70936ENG&D1=0&D2=623,636,649,662,675,688,701,714&LA=EN&VW=T> on October 7, 2018.
4. Saadatmand S, Geuzinge HA, Rutgers EJT, Mann RM, de Roy van Zuidewijn DBW, Zonderland HM, et al. MRI versus mammography for breast cancer screening in women with familial risk (FaMRisc): a multicentre, randomised, controlled trial. *Lancet Oncol.* 2019;20(8):1136-47.
